# Supplementary material for: Application of MCD spectroscopy and TD-DFT to endohedral metallofullerenes for characterization of their electronic transitions
Source: Royal Society of Chemistry journal article supplement (doi:10.1039/c3cp44096f), 2013-01-01
Supplement: c3cp44096f.pdf [file c3cp44096f.pdf]

Electronic Supplementary Information

**Application of MCD Spectroscopy and TD-DFT to Endohedral Metallofullerenes  
for Characterization of Their Electronic Transitions**

Michio Yamada,<sup>a</sup> Zdenek Slanina,<sup>b</sup> Naomi Mizorogi,<sup>b</sup> Atsuya Muranaka,<sup>c</sup> Yutaka  
Maeda,<sup>a</sup> Shigeru Nagase,<sup>\*d</sup> Takeshi Akasaka,<sup>\*b</sup> and Nagao Kobayashi<sup>\*e</sup>

**Atomic coordinate data of La@C<sub>2v</sub>-C<sub>82</sub>**

Energy: -2234172.7141493 Hartree

|    |          |         |          |
|----|----------|---------|----------|
| La | 0.00000  | 0.00000 | 1.66951  |
| C  | 0.00000  | 3.08693 | 2.62571  |
| C  | -2.68094 | 0.00000 | 2.98829  |
| C  | -3.11636 | 1.16709 | 2.24325  |
| C  | -2.35959 | 2.37386 | 2.26375  |
| C  | -1.16169 | 2.37787 | 3.07034  |
| C  | -0.73732 | 1.23439 | 3.85014  |
| C  | -1.50665 | 0.00000 | 3.81102  |
| C  | -3.76859 | 0.71874 | 1.05014  |
| C  | -2.38716 | 3.18432 | 1.10510  |
| C  | 0.00000  | 3.86728 | 1.41580  |
| C  | -3.69410 | 1.46497 | -0.16404 |
| C  | -1.21718 | 3.94132 | 0.68565  |
| C  | -1.21285 | 4.01326 | -0.74278 |
| C  | -2.39618 | 3.32213 | -1.20180 |
| C  | 0.00000  | 3.96271 | -1.49180 |
| C  | -3.08651 | 2.75197 | -0.07652 |
| C  | -2.40233 | 2.66066 | -2.41112 |
| C  | 0.00000  | 3.25887 | -2.78208 |
| C  | -1.20557 | 2.64790 | -3.23561 |
| C  | -3.66630 | 0.73392 | -1.43435 |
| C  | -3.09104 | 1.40398 | -2.55127 |
| C  | -1.20287 | 1.42385 | -3.96997 |
| C  | 0.00000  | 0.73716 | -4.28728 |

|   |          |          |          |
|---|----------|----------|----------|
| C | -2.39712 | 0.68608  | -3.58583 |
| C | 0.00000  | -3.08693 | 2.62571  |
| C | 2.68094  | 0.00000  | 2.98829  |
| C | -3.11636 | -1.16709 | 2.24325  |
| C | 3.11636  | 1.16709  | 2.24325  |
| C | 3.11636  | -1.16709 | 2.24325  |
| C | -2.35959 | -2.37386 | 2.26375  |
| C | 2.35959  | 2.37386  | 2.26375  |
| C | 2.35959  | -2.37386 | 2.26375  |
| C | -1.16169 | -2.37787 | 3.07034  |
| C | 1.16169  | 2.37787  | 3.07034  |
| C | 1.16169  | -2.37787 | 3.07034  |
| C | -0.73732 | -1.23439 | 3.85014  |
| C | 0.73732  | 1.23439  | 3.85014  |
| C | 0.73732  | -1.23439 | 3.85014  |
| C | 1.50665  | 0.00000  | 3.81102  |
| C | -3.76859 | -0.71874 | 1.05014  |
| C | 3.76859  | 0.71874  | 1.05014  |
| C | 3.76859  | -0.71874 | 1.05014  |
| C | -2.38716 | -3.18432 | 1.10510  |
| C | 2.38716  | 3.18432  | 1.10510  |
| C | 2.38716  | -3.18432 | 1.10510  |
| C | 0.00000  | -3.86728 | 1.41580  |
| C | -3.69410 | -1.46497 | -0.16404 |
| C | 3.69410  | 1.46497  | -0.16404 |
| C | 3.69410  | -1.46497 | -0.16404 |
| C | -1.21718 | -3.94132 | 0.68565  |
| C | 1.21718  | 3.94132  | 0.68565  |
| C | 1.21718  | -3.94132 | 0.68565  |
| C | -1.21285 | -4.01326 | -0.74278 |
| C | 1.21285  | 4.01326  | -0.74278 |
| C | 1.21285  | -4.01326 | -0.74278 |
| C | -2.39618 | -3.32213 | -1.20180 |

|   |          |          |          |
|---|----------|----------|----------|
| C | 2.39618  | 3.32213  | -1.20180 |
| C | 2.39618  | -3.32213 | -1.20180 |
| C | 0.00000  | -3.96271 | -1.49180 |
| C | -3.08651 | -2.75197 | -0.07652 |
| C | 3.08651  | 2.75197  | -0.07652 |
| C | 3.08651  | -2.75197 | -0.07652 |
| C | -2.40233 | -2.66066 | -2.41112 |
| C | 2.40233  | 2.66066  | -2.41112 |
| C | 2.40233  | -2.66066 | -2.41112 |
| C | 0.00000  | -3.25887 | -2.78208 |
| C | -1.20557 | -2.64790 | -3.23561 |
| C | 1.20557  | 2.64790  | -3.23561 |
| C | 1.20557  | -2.64790 | -3.23561 |
| C | -3.66630 | -0.73392 | -1.43435 |
| C | 3.66630  | 0.73392  | -1.43435 |
| C | 3.66630  | -0.73392 | -1.43435 |
| C | -3.09104 | -1.40398 | -2.55127 |
| C | 3.09104  | 1.40398  | -2.55127 |
| C | 3.09104  | -1.40398 | -2.55127 |
| C | -1.20287 | -1.42385 | -3.96997 |
| C | 1.20287  | 1.42385  | -3.96997 |
| C | 1.20287  | -1.42385 | -3.96997 |
| C | 0.00000  | -0.73716 | -4.28728 |
| C | -2.39712 | -0.68608 | -3.58583 |
| C | 2.39712  | 0.68608  | -3.58583 |
| C | 2.39712  | -0.68608 | -3.58583 |

**Atomic coordinate data of  $\text{La}_2@I_h\text{-C}_{80}$**

Energy: -2459755.8244025 Hartree

|    |          |         |         |
|----|----------|---------|---------|
| La | -1.86782 | 0.00000 | 0.00000 |
| La | 1.86782  | 0.00000 | 0.00000 |
| C  | -3.97193 | 0.74320 | 1.23874 |
| C  | -3.15171 | 1.16596 | 2.36391 |

|   |          |          |          |
|---|----------|----------|----------|
| C | -2.67946 | 0.00000  | 3.05254  |
| C | -3.95247 | 1.51881  | 0.00000  |
| C | -3.12441 | 2.69576  | 0.00000  |
| C | -2.38662 | 3.15153  | 1.16675  |
| C | -2.35466 | 2.37024  | 2.35798  |
| C | -1.16658 | 2.39355  | 3.14249  |
| C | -0.71893 | 1.22243  | 3.85482  |
| C | -1.44420 | 0.00000  | 3.79854  |
| C | -1.22599 | 3.86269  | 0.72067  |
| C | 0.00000  | 3.81982  | 1.46073  |
| C | 0.00000  | 3.11216  | 2.69795  |
| C | -3.97193 | -0.74320 | 1.23874  |
| C | 3.97193  | 0.74320  | 1.23874  |
| C | 3.97193  | -0.74320 | 1.23874  |
| C | -3.97193 | 0.74320  | -1.23874 |
| C | -3.97193 | -0.74320 | -1.23874 |
| C | 3.97193  | 0.74320  | -1.23874 |
| C | 3.97193  | -0.74320 | -1.23874 |
| C | -3.15171 | -1.16596 | 2.36391  |
| C | 3.15171  | 1.16596  | 2.36391  |
| C | 3.15171  | -1.16596 | 2.36391  |
| C | -3.15171 | 1.16596  | -2.36391 |
| C | -3.15171 | -1.16596 | -2.36391 |
| C | 3.15171  | 1.16596  | -2.36391 |
| C | 3.15171  | -1.16596 | -2.36391 |
| C | 2.67946  | 0.00000  | 3.05254  |
| C | -2.67946 | 0.00000  | -3.05254 |
| C | 2.67946  | 0.00000  | -3.05254 |
| C | -3.95247 | -1.51881 | 0.00000  |
| C | 3.95247  | 1.51881  | 0.00000  |
| C | 3.95247  | -1.51881 | 0.00000  |
| C | -3.12441 | -2.69576 | 0.00000  |
| C | 3.12441  | 2.69576  | 0.00000  |

|   |          |          |          |
|---|----------|----------|----------|
| C | 3.12441  | -2.69576 | 0.00000  |
| C | -2.38662 | -3.15153 | 1.16675  |
| C | 2.38662  | 3.15153  | 1.16675  |
| C | 2.38662  | -3.15153 | 1.16675  |
| C | -2.38662 | 3.15153  | -1.16675 |
| C | -2.38662 | -3.15153 | -1.16675 |
| C | 2.38662  | 3.15153  | -1.16675 |
| C | 2.38662  | -3.15153 | -1.16675 |
| C | -2.35466 | -2.37024 | 2.35798  |
| C | 2.35466  | 2.37024  | 2.35798  |
| C | 2.35466  | -2.37024 | 2.35798  |
| C | -2.35466 | 2.37024  | -2.35798 |
| C | -2.35466 | -2.37024 | -2.35798 |
| C | 2.35466  | 2.37024  | -2.35798 |
| C | 2.35466  | -2.37024 | -2.35798 |
| C | -1.16658 | -2.39355 | 3.14249  |
| C | 1.16658  | 2.39355  | 3.14249  |
| C | 1.16658  | -2.39355 | 3.14249  |
| C | -1.16658 | 2.39355  | -3.14249 |
| C | -1.16658 | -2.39355 | -3.14249 |
| C | 1.16658  | 2.39355  | -3.14249 |
| C | 1.16658  | -2.39355 | -3.14249 |
| C | -0.71893 | -1.22243 | 3.85482  |
| C | 0.71893  | 1.22243  | 3.85482  |
| C | 0.71893  | -1.22243 | 3.85482  |
| C | -0.71893 | 1.22243  | -3.85482 |
| C | -0.71893 | -1.22243 | -3.85482 |
| C | 0.71893  | 1.22243  | -3.85482 |
| C | 0.71893  | -1.22243 | -3.85482 |
| C | 1.44420  | 0.00000  | 3.79854  |
| C | -1.44420 | 0.00000  | -3.79854 |
| C | 1.44420  | 0.00000  | -3.79854 |
| C | -1.22599 | -3.86269 | 0.72067  |

|   |          |          |          |
|---|----------|----------|----------|
| C | 1.22599  | 3.86269  | 0.72067  |
| C | 1.22599  | -3.86269 | 0.72067  |
| C | -1.22599 | 3.86269  | -0.72067 |
| C | -1.22599 | -3.86269 | -0.72067 |
| C | 1.22599  | 3.86269  | -0.72067 |
| C | 1.22599  | -3.86269 | -0.72067 |
| C | 0.00000  | -3.81982 | 1.46073  |
| C | 0.00000  | 3.81982  | -1.46073 |
| C | 0.00000  | -3.81982 | -1.46073 |
| C | 0.00000  | -3.11216 | 2.69795  |
| C | 0.00000  | 3.11216  | -2.69795 |
| C | 0.00000  | -3.11216 | -2.69795 |

**Atomic coordinate data of Sc<sub>3</sub>N@I<sub>h</sub>-C<sub>80</sub>**

Energy: -2035484.7047463 Hartree

|    |          |          |          |
|----|----------|----------|----------|
| Sc | -0.16122 | 2.01528  | 0.00000  |
| Sc | -0.02705 | -1.14722 | 1.66623  |
| Sc | -0.02705 | -1.14722 | -1.66623 |
| N  | -0.05579 | -0.01915 | 0.00000  |
| C  | 3.81714  | 0.41187  | 1.45755  |
| C  | -3.79564 | -0.38988 | 1.45417  |
| C  | 3.73994  | 1.63234  | 0.71935  |
| C  | 3.98737  | -0.79534 | 0.71982  |
| C  | -3.71168 | -1.60997 | 0.71932  |
| C  | -3.97677 | 0.81975  | 0.71908  |
| C  | 3.10878  | 0.33850  | 2.70222  |
| C  | -3.07742 | -0.31404 | 2.69200  |
| C  | 2.26990  | 1.41638  | 3.15294  |
| C  | 2.51586  | -0.88907 | 3.13591  |
| C  | -2.24446 | -1.39641 | 3.13775  |
| C  | -2.48478 | 0.91179  | 3.14299  |
| C  | 1.15230  | 0.85613  | 3.86019  |
| C  | 1.29392  | -0.58441 | 3.86532  |

|   |          |          |          |
|---|----------|----------|----------|
| C | -1.12374 | -0.84269 | 3.88584  |
| C | -1.27757 | 0.59579  | 3.85815  |
| C | 0.17065  | -1.48318 | 3.93987  |
| C | -0.13891 | 1.45345  | 3.80790  |
| C | 2.89174  | 2.69892  | 1.16573  |
| C | 3.40514  | -2.03216 | 1.16773  |
| C | -2.88328 | -2.69749 | 1.16883  |
| C | -3.37158 | 2.04331  | 1.16537  |
| C | 2.36015  | 3.37141  | 0.00000  |
| C | 3.03826  | -2.79348 | 0.00000  |
| C | -2.37121 | -3.37053 | 0.00000  |
| C | -2.99516 | 2.81023  | 0.00000  |
| C | 1.08875  | 4.03250  | 0.00000  |
| C | 1.86987  | -3.58808 | 0.00000  |
| C | -1.06350 | -3.90496 | 0.00000  |
| C | -1.87526 | 3.70465  | 0.00000  |
| C | 1.11655  | -3.67825 | 1.21635  |
| C | -0.30921 | -3.83825 | 1.22098  |
| C | -1.12579 | 3.82386  | 1.22879  |
| C | 0.33004  | 3.98464  | 1.23064  |
| C | 0.30022  | -2.75035 | 3.22554  |
| C | -0.26964 | 2.67396  | 3.07228  |
| C | 0.83956  | 3.24122  | 2.36230  |
| C | 1.49445  | -2.98172 | 2.41362  |
| C | -0.82890 | -3.26418 | 2.43659  |
| C | -1.47282 | 2.99764  | 2.36282  |
| C | 2.12019  | 2.59105  | 2.35601  |
| C | 2.61953  | -2.07742 | 2.35655  |
| C | -2.10879 | -2.59335 | 2.36742  |
| C | -2.58893 | 2.09639  | 2.35100  |
| C | 3.81714  | 0.41187  | -1.45755 |
| C | -3.79564 | -0.38988 | -1.45417 |
| C | 3.73994  | 1.63234  | -0.71935 |

|   |          |          |          |
|---|----------|----------|----------|
| C | 3.98737  | -0.79534 | -0.71982 |
| C | -3.71168 | -1.60997 | -0.71932 |
| C | -3.97677 | 0.81975  | -0.71908 |
| C | 3.10878  | 0.33850  | -2.70222 |
| C | -3.07742 | -0.31404 | -2.69200 |
| C | 2.26990  | 1.41638  | -3.15294 |
| C | 2.51586  | -0.88907 | -3.13591 |
| C | -2.24446 | -1.39641 | -3.13775 |
| C | -2.48478 | 0.91179  | -3.14299 |
| C | 1.15230  | 0.85613  | -3.86019 |
| C | 1.29392  | -0.58441 | -3.86532 |
| C | -1.12374 | -0.84269 | -3.88584 |
| C | -1.27757 | 0.59579  | -3.85815 |
| C | 0.17065  | -1.48318 | -3.93987 |
| C | -0.13891 | 1.45345  | -3.80790 |
| C | 2.89174  | 2.69892  | -1.16573 |
| C | 3.40514  | -2.03216 | -1.16773 |
| C | -2.88328 | -2.69749 | -1.16883 |
| C | -3.37158 | 2.04331  | -1.16537 |
| C | 1.11655  | -3.67825 | -1.21635 |
| C | -0.30921 | -3.83825 | -1.22098 |
| C | -1.12579 | 3.82386  | -1.22879 |
| C | 0.33004  | 3.98464  | -1.23064 |
| C | 0.30022  | -2.75035 | -3.22554 |
| C | -0.26964 | 2.67396  | -3.07228 |
| C | 0.83956  | 3.24122  | -2.36230 |
| C | 1.49445  | -2.98172 | -2.41362 |
| C | -0.82890 | -3.26418 | -2.43659 |
| C | -1.47282 | 2.99764  | -2.36282 |
| C | 2.12019  | 2.59105  | -2.35601 |
| C | 2.61953  | -2.07742 | -2.35655 |
| C | -2.10879 | -2.59335 | -2.36742 |
| C | -2.58893 | 2.09639  | -2.35100 |
